# Supplementary material
Source: HighWire-hosted journal article supplement (https://bmjopen.bmj.com/content/6/9/e012972)
Supplement: inline-supplementary-material-1 [file inline-supplementary-material-1.pdf]

**Supplementary Table 1. Baseline characteristics and percentage change in macular thickness**

|                  | Healthy group |                | <i>P</i> value       | Vitrectomy group |                  | <i>P</i> value     |
|------------------|---------------|----------------|----------------------|------------------|------------------|--------------------|
|                  | VMA<br>(n=54) | VMS<br>(n=164) |                      | ILMon<br>(n=26)  | ILMoff<br>(n=93) |                    |
| Female no. (%)   | 31(57.4)      | 118(72.0)      | 0.046 <sup>a</sup>   | 14(53.8)         | 66(71.0)         | 0.10 <sup>a</sup>  |
| Age (years)      | 65.2±6.4      | 69.3±6.5       | <0.0001 <sup>b</sup> | 69.9±7.3         | 68.4±6.0         | 0.27 <sup>b</sup>  |
| range            | (56-84)       | (56-86)        |                      | (56-80)          | (57-80)          |                    |
| Axial length(mm) | 23.5±1.2      | 23.6±1.2       | 0.95 <sup>b</sup>    | 24.1±1.6         | 23.3±1.3         | 0.012 <sup>b</sup> |
| range            | (21.0-26.1)   | (21.3-27.1)    |                      | (22.1-27.0)      | (21.5-27.7)      |                    |
| Sectors (%/year) |               |                |                      |                  |                  |                    |
| Central          | 0.31±0.72     | -0.22±0.93     | 0.0001 <sup>b</sup>  | -0.65±0.82       | -0.31±1.1        | 0.15 <sup>b</sup>  |
| inner superior   | 0.073±0.55    | -0.30±0.67     | 0.0003 <sup>b</sup>  | -0.58±0.57       | -0.69±0.73       | 0.47 <sup>b</sup>  |
| inner temporal   | 0.032±0.53    | -0.29±0.69     | 0.0020 <sup>b</sup>  | -0.46±0.56       | -0.86±0.83       | 0.021 <sup>b</sup> |
| inner inferior   | 0.064±1.5     | -0.35±0.66     | <0.0001 <sup>b</sup> | -0.37±0.56       | -0.77±0.77       | 0.017 <sup>b</sup> |
| inner nasal      | 0.024±0.50    | -0.28±0.63     | 0.0013 <sup>b</sup>  | -0.43±0.54       | -0.50±0.70       | 0.64 <sup>b</sup>  |

VMA=vitreomacular adhesion

<sup>a</sup> Chi-square test

VMS=vitreomacular separation

<sup>b</sup> Unpaired t-test

ILM=internal limiting membrane

**Supplementary Table 2. Multiple regression analysis for percentage change in macular thickness among healthy group**

|                 | central |                | superior |                | temporal |                | inferior |                | nasal   |                |
|-----------------|---------|----------------|----------|----------------|----------|----------------|----------|----------------|---------|----------------|
|                 | $\beta$ | <i>P</i> value | $\beta$  | <i>P</i> value | $\beta$  | <i>P</i> value | $\beta$  | <i>P</i> value | $\beta$ | <i>P</i> value |
| Women           | -0.055  | 0.46           | -0.025   | 0.73           | -0.071   | 0.35           | -0.068   | 0.36           | -0.02   | 0.79           |
| Age             | -0.11   | 0.12           | -0.088   | 0.22           | -0.033   | 0.65           | -0.062   | 0.38           | -0.028  | 0.7            |
| Axial length    | -0.13   | 0.076          | -0.11    | 0.13           | -0.085   | 0.26           | -0.079   | 0.29           | -0.076  | 0.31           |
| Presence of VMA | 0.19    | 0.0076         | 0.24     | 0.011          | 0.20     | 0.0058         | 0.26     | 0.0002         | 0.22    | 0.0025         |

VMA=vitreomacular adhesion

**Supplementary Table 3. Multiple regression analysis for percentage change in macular thickness among vitrectomy group**

|              | central |                | superior |                | temporal |                | inferior |                | nasal   |                |
|--------------|---------|----------------|----------|----------------|----------|----------------|----------|----------------|---------|----------------|
|              | $\beta$ | <i>P</i> value | $\beta$  | <i>P</i> value | $\beta$  | <i>P</i> value | $\beta$  | <i>P</i> value | $\beta$ | <i>P</i> value |
| Women        | -0.006  | 0.95           | 0.13     | 0.21           | 0.003    | 0.98           | 0.084    | 0.41           | 0.088   | 0.39           |
| Age          | -0.21   | 0.034          | -0.21    | 0.031          | -0.17    | 0.069          | -0.21    | 0.025          | -0.090  | 0.35           |
| Axial length | -0.043  | 0.690          | -0.22    | 0.044          | -0.25    | 0.020          | -0.17    | 0.11           | -0.25   | 0.022          |
| ILM peeling  | 0.088   | 0.36           | -0.17    | 0.077          | -0.29    | 0.0023         | -0.30    | 0.0017         | -0.12   | 0.20           |

ILM=internal limiting membrane

**Supplementary Table 4. Baseline characteristics and percentage change in macular thickness among healthy and ILMon group**

| Healthy | ILMon  |         |
|---------|--------|---------|
| (n=218) | (n=26) | p value |

|                         |                    |                    |                           |
|-------------------------|--------------------|--------------------|---------------------------|
| <b>Women no. (%)</b>    | <b>149(68.3)</b>   | <b>14(53.8)</b>    | <b>0.14<sup>a</sup></b>   |
| <b>Age (years)</b>      | <b>65.3±6.7</b>    | <b>69.9±7.3</b>    | <b>0.24<sup>b</sup></b>   |
| <b>range</b>            | <b>(56-86)</b>     | <b>(56-80)</b>     |                           |
| <b>Axial length(mm)</b> | <b>23.6±1.2</b>    | <b>24.1±1.6</b>    | <b>0.035<sup>b</sup></b>  |
| <b>range</b>            | <b>(21.0-27.1)</b> | <b>(22.1-27.0)</b> |                           |
| <b>Sectors (%/year)</b> |                    |                    |                           |
| <b>Central</b>          | <b>-0.088±0.91</b> | <b>-0.65±0.82</b>  | <b>0.0031<sup>b</sup></b> |
| <b>inner superior</b>   | <b>-0.21±0.66</b>  | <b>-0.58±0.57</b>  | <b>0.0063<sup>b</sup></b> |
| <b>inner temporal</b>   | <b>-0.21±0.67</b>  | <b>-0.46±0.56</b>  | <b>0.065<sup>b</sup></b>  |
| <b>inner inferior</b>   | <b>-0.25±0.64</b>  | <b>-0.37±0.56</b>  | <b>0.33<sup>b</sup></b>   |
| <b>inner nasal</b>      | <b>-0.21±0.61</b>  | <b>-0.43±0.54</b>  | <b>0.075<sup>b</sup></b>  |

**ILM=internal limiting membrane**

<sup>a</sup> **Chi-square test**

<sup>b</sup> **Unpaired t-test**

Supplementary Table 5. Multiple regression analysis for percentage change in macular thickness among healthy and ILMon group

|              | central |                | superior |                | temporal |                | inferior |                | nasal   |                |
|--------------|---------|----------------|----------|----------------|----------|----------------|----------|----------------|---------|----------------|
|              | $\beta$ | <i>P</i> value | $\beta$  | <i>P</i> value | $\beta$  | <i>P</i> value | $\beta$  | <i>P</i> value | $\beta$ | <i>P</i> value |
| Women        | -0.075  | 0.29           | -0.026   | 0.72           | -0.083   | 0.25           | -0.093   | 0.2            | -0.031  | 0.67           |
| Age          | -0.17   | 0.014          | -0.13    | 0.055          | -0.064   | 0.35           | -0.12    | 0.072          | -0.064  | 0.35           |
| Axial length | -0.12   | 0.100          | -0.16    | 0.029          | -0.10    | 0.19           | -0.093   | 0.22           | -0.12   | 0.11           |
| ILMon        | -0.15   | 0.028          | -0.14    | 0.04           | -0.11    | 0.12           | -0.043   | 0.52           | -0.1    | 0.14           |

ILM=internal limiting membrane
